# Supplementary material for: Whole body magnetic resonance imaging in newly diagnosed multiple myeloma: early changes in lesional signal fat fraction predict disease response
Source: PubMed Central journal article supplement (PMC5244686; doi:10.1111/bjh.14401), 2016-10-21
Supplement: BJH-176-222-s001.pdf [file BJH-176-222-s001.pdf]

**Supplementary Table 1.** Correlation between baseline MRI parameters and depth of response to first line therapy.

|                                  | Median eTV<br>(IQR)  | Median sFF<br>(IQR)  | Median ER<br>(IQR)     | Median ADC<br>(IQR)  | Median DWI<br>FL count (IQR) | Median Post-<br>contrast FL load<br>(IQR) |
|----------------------------------|----------------------|----------------------|------------------------|----------------------|------------------------------|-------------------------------------------|
| <i>CR/VGPR</i><br>(n=13)         | 0.25 (0.15-<br>1.05) | 0.25 (0.21-<br>0.38) | 116.6 (98.6-<br>187.9) | 0.78 (0.58-<br>1.25) | 61 (33.5-84.5)               | 40 (22-53.5)                              |
| <i>≤ PR</i> (n=12)               | 0.16 (0.08-<br>0.71) | 0.35 (0.29-<br>0.49) | 89.4 (71.1-<br>124.3)  | 0.68 (0.57-<br>0.76) | 32.5 (25.7-<br>59.7)         | 22 (13.5-24)                              |
| <i>P value</i><br><i>summary</i> | 0.576                | 0.002 †              | 0.335                  | 0.053                | 0.079                        | 0.046 †                                   |
| <i>r value</i><br><i>summary</i> | 0.117                | -0.592               | 0.201                  | 0.391                | 0.357                        | 0.402                                     |

**IQR:** Interquartile range, **CR:** Complete response, **VGPR:** Very good partial response, **PR:** partial response, **eTV:** estimated tumour volume, **sFF:** Signal fat fraction, **ADC:** Apparent diffusion coefficient, **FL:** focal lesion, **DWI:** Diffusion weighted imaging

† Significant correlation

r: Spearman correlation coefficient

**Supplementary Table 2.** Details of patients with paired scans.

|                                      | CR/VGPR                  | PR or less               |
|--------------------------------------|--------------------------|--------------------------|
| Patient Characteristic (N=21)        | Number or Median (range) | Number or Median (range) |
| <b>Age</b>                           | <b>58.8 (46-69)</b>      | <b>51.5 (36-61)</b>      |
| <b>Sex</b>                           | <b>Male/Female: 7/5</b>  | <b>Male/Female: 6/3</b>  |
| <b>Chain Isotype</b>                 |                          |                          |
| <i>IgG</i>                           | 7                        | 7                        |
| <i>IgA</i>                           | 4                        | 0                        |
| <i>Light chain</i>                   | 1                        | 2                        |
| <b>ISS stage</b>                     |                          |                          |
| <i>I</i>                             | 3                        | 3                        |
| <i>II</i>                            | 7                        | 5                        |
| <i>III</i>                           | 2                        | 1                        |
| <b>DS-PLUS Stage</b>                 |                          |                          |
| <i>I</i>                             | 0                        | 1                        |
| <i>II</i>                            | 1                        | 1                        |
| <i>III</i>                           | 11                       | 7                        |
| <b>Induction regimen</b>             |                          |                          |
| <i>PAD</i>                           | 9                        | 7                        |
| <i>CVD</i>                           | 1                        | 2                        |
| <i>VTD</i>                           | 2                        | 0                        |
| <b>Bone Marrow plasmacytosis (%)</b> | <b>54.2(13-90)</b>       | <b>59.4 (30-80)</b>      |
| <b>Beta-2 Microglobulin (mg/L)</b>   | <b>4.4 (1.3-10.3)</b>    | <b>3.3 (1.8-6.4)</b>     |
| <b>Creatinine (umol/L)</b>           | <b>80.2 (58-100)</b>     | <b>80.3 (58-105)</b>     |

**ISS:** International staging system **DS-PLUS:** Durie-Salmon PLUS **PAD:** Bortezomib, Doxorubicin, Dexamethasone **CVD:** Cyclophosphamide, Bortezomib, Dexamethasone **VTD:** Bortezomib, Thalidomide, Dexamethasone

**Supplementary Table 3:** Changes in median FF and ADC in individual patients who underwent paired scans. To assess temporal changes of MRI parameters in each patient, a Wilcoxon matched-pairs signed rank test was used and  $p < 0.05$  defined as significant changes compared to baseline.

| Pt ID | Response | FL no | sFF pre | sFF post | p-value            | ADC pre | ADC post | p-value            |
|-------|----------|-------|---------|----------|--------------------|---------|----------|--------------------|
| ID 1  | CR       | 20    | 0.244   | 0.375    | <0.01 <sup>†</sup> | 1.318   | 1.654    | 0.03 <sup>†</sup>  |
| ID 2  | CR       | 20    | 0.188   | 0.373    | <0.01 <sup>†</sup> | 1.244   | 1.457    | 0.61               |
| ID 3  | CR       | 4     | 0.272   | 0.357    | 0.12               | 1.385   | 1.895    | 0.62               |
| ID 4  | VGPR     | 20    | 0.192   | 0.658    | <0.01 <sup>†</sup> | 0.795   | 1.473    | <0.01 <sup>†</sup> |
| ID 5  | VGPR     | 8     | 0.292   | 0.831    | 0.02 <sup>†</sup>  | 0.275   | 0.634    | 0.14               |
| ID 6  | VGPR     | 18    | 0.271   | 0.373    | 0.01 <sup>†</sup>  | 0.779   | 2.085    | <0.01 <sup>†</sup> |
| ID 7  | VGPR     | 20    | 0.226   | 0.433    | <0.01 <sup>†</sup> | 0.756   | 1.434    | <0.01 <sup>†</sup> |
| ID 8  | VGPR     | 20    | 0.22    | 0.488    | <0.01 <sup>†</sup> | 1.263   | 1.905    | <0.01 <sup>†</sup> |
| ID 9  | VGPR     | 20    | 0.376   | 0.637    | <0.01 <sup>†</sup> | 0.507   | 0.429    | 0.69               |
| ID 10 | VGPR     | 20    | 0.198   | 0.604    | <0.01 <sup>†</sup> | 0.628   | 1.530    | <0.01 <sup>†</sup> |
| ID 11 | VGPR     | 20    | 0.246   | 0.432    | <0.01 <sup>†</sup> | 0.741   | 1.560    | <0.01 <sup>†</sup> |
| ID 12 | VGPR     | 18    | 0.249   | 0.450    | <0.01 <sup>†</sup> | 1.074   | 0.702    | 0.01 <sup>†</sup>  |
| ID 13 | PR       | 1     | 0.632   | 0.873    | N/A                | 0.647   | 0.754    | N/A                |
| ID 14 | PR       | 11    | 0.364   | 0.478    | 0.01 <sup>†</sup>  | 0.959   | 1.265    | 0.24               |
| ID 15 | PR       | 20    | 0.325   | 0.470    | <0.01 <sup>†</sup> | 1.098   | 1.345    | 0.02 <sup>†</sup>  |
| ID 16 | MR       | 11    | 0.227   | 0.210    | 0.63               | 0.772   | 1.374    | 0.03 <sup>†</sup>  |
| ID 17 | MR       | 20    | 0.255   | 0.275    | 0.10               | 0.706   | 1.180    | 0.02 <sup>†</sup>  |
| ID 18 | MR       | 8     | 0.493   | 0.554    | 0.25               | 0.659   | 0.741    | 0.84               |
| ID 19 | MR       | 16    | 0.409   | 0.589    | 0.14               | 0.367   | 0.365    | 0.69               |
| ID 20 | SD       | 19    | 0.400   | 0.367    | 0.16               | 0.487   | 0.405    | 0.10               |
| ID 21 | Prog     | 9     | 0.595   | 0.683    | 0.82               | 0.55    | 0.62     | 0.49               |

**FL no:** Focal lesion number assessed, **sFF:** Signal fat fraction, **ADC:** Apparent diffusion coefficient  
**CR:** Complete response, **VGPR:** Very good partial response, **PR:** Partial response  
**MR:** Minimal response, **SD:** Stable disease, **Prog:** Progressive disease  
<sup>†</sup>: Significant change ( $p < 0.05$ ) compared with baseline scan.

**Supplementary Table 4:** Prognostic performance of signal fat fraction (sFF) changes in CR/VGPR and  $\leq$  PR groups. Percentage changes in sFF [(8 weeks-baseline) \* 100] and the percentage (n/total) of patients that fall into 5 different categories are summarized for each group.

| Changes in sFF | CR/VGPR (n/total) | $\leq$ PR (n/total) |
|----------------|-------------------|---------------------|
| 0-9%           | 1/12 (8.3%)       | 6/9 (66.6%)         |
| $\geq$ 10%     | 11/12 (91.6%)     | 3/9 (33.3%)         |
| $\geq$ 20%     | 5/12 (41.6%)      | 1/9 (11.1%)         |
| $\geq$ 30%     | 3/12 (25%)        | 0/9 (0%)            |
| $\geq$ 40%     | 1/12 (8.3%)       | 0/9 (0%)            |

**sFF:** Signal fat fraction

**CR:** Complete response

**VGPR:** Very good partial response

**PR:** Partial response

## Supplementary Figure 1

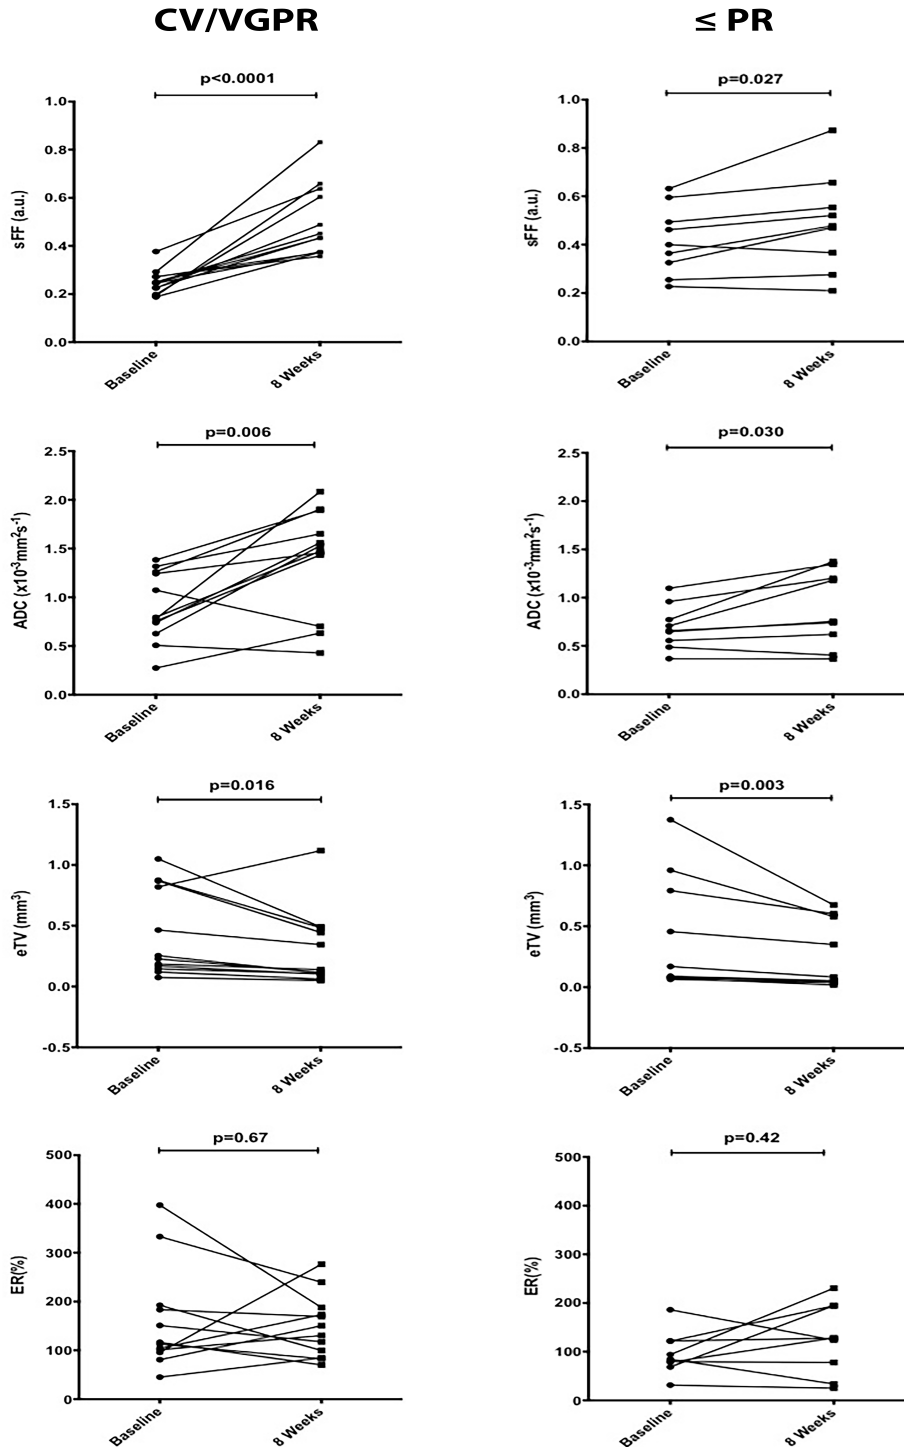

**Supplementary Figure 1.** Changes in signal fat fraction (sFF), apparent diffusion coefficient (ADC), estimated tumour volume (eTV) and enhancement ratio (ER) according to response. Data (median for each parameter) are given for each patient in the two groups achieving CR/VGPR (n=12) and  $\leq$  PR (n=9).

Wilcoxon signed-matched rank test was used to assess temporal changes of each MRI parameter in each group and  $p < 0.05$  defined as significant.

## Supplementary Figure 2

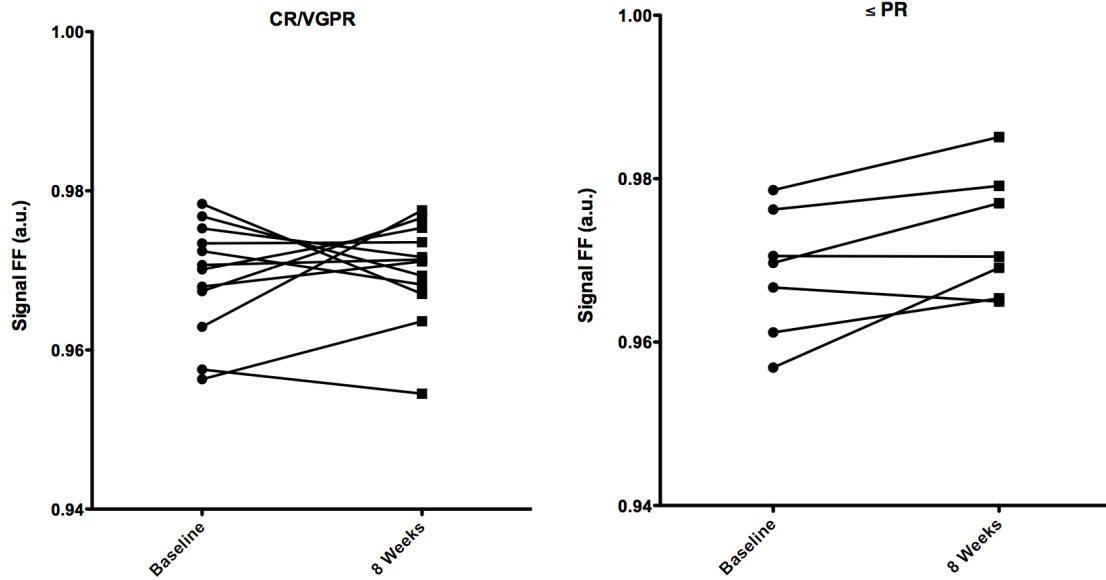

**Supplementary Figure 2.** Signal fat fraction (sFF) changes of femoral greater trochanter in CR/VGPR and  $\leq$  PR groups. For CR/VGPR group, mean (SD) of sFF were 0.97 ( $\pm$ 0.007) and 0.97 ( $\pm$ 0.006) at baseline and 8 weeks, respectively ( $p=0.73$ ).

For  $\leq$  PR group mean (SD) of sFF were 0.97 ( $\pm$ 0.008) and 0.97 ( $\pm$ 0.007) at baseline and 8 weeks, respectively ( $p=0.078$ ).

Each data point represents sFF measurement of greater trochanter in each patient. A paired  $t$ -test was used to assess the temporal changes of femoral greater trochanter's sFF and  $p<0.05$  defined as significant.

### Supplementary Figure 3

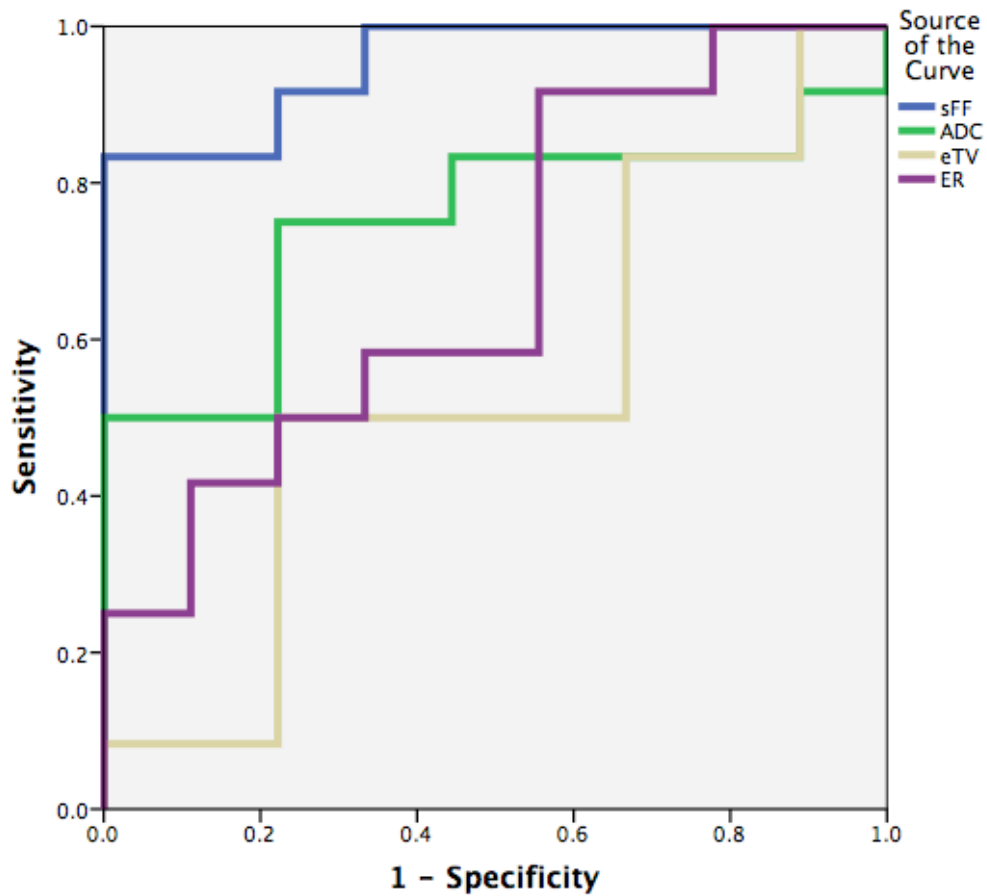

**Supplementary Figure 3.** Receiver operating characteristic curves (ROC) for percentage changes ( $\Delta$ ) in signal fat fraction (sFF), apparent diffusion coefficient (ADC), estimated tumour volume (eTV) and enhancement ratio (ER) as predictor of  $\leq$  PR. Area under the curve (AUC) and 95% confidence interval (95% CI) are 0.95 (95% CI 0.87-1.00), 0.75 (95% CI 0.53-0.97), 0.54 (95% CI 0.27-0.80) and 0.68 (95% CI 0.45-0.92) for sFF, ADC, eTV and ER, respectively.
